# Supplementary material for: First report of Zn2+ sensing exclusively at mesoscopic interfacesElectronic supplementary information (ESI) available: additional Figs. 1–3. See http://www.rsc.org/suppdata/cc/b3/b301364b/
Source: Royal Society of Chemistry journal article supplement (doi:10.1039/b301364b), 2003-04-09
Supplement: b301364b.pdf [file b301364b.pdf]

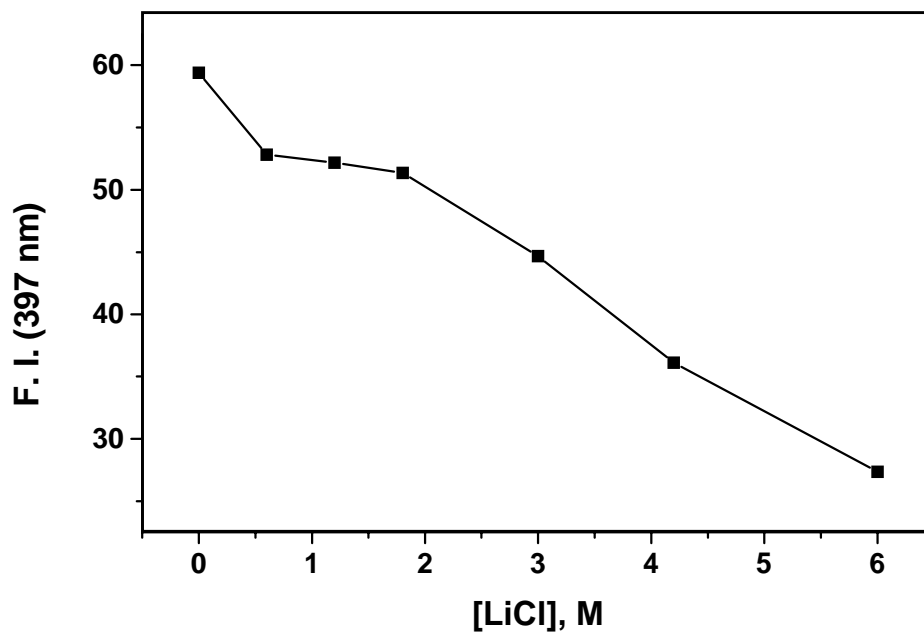

Figure 1. The effect of increasing amount of LiCl on the Pybpa fluorescence. The Fluorescence intensity at 397 nm is plotted against the molar concentration of LiCl.

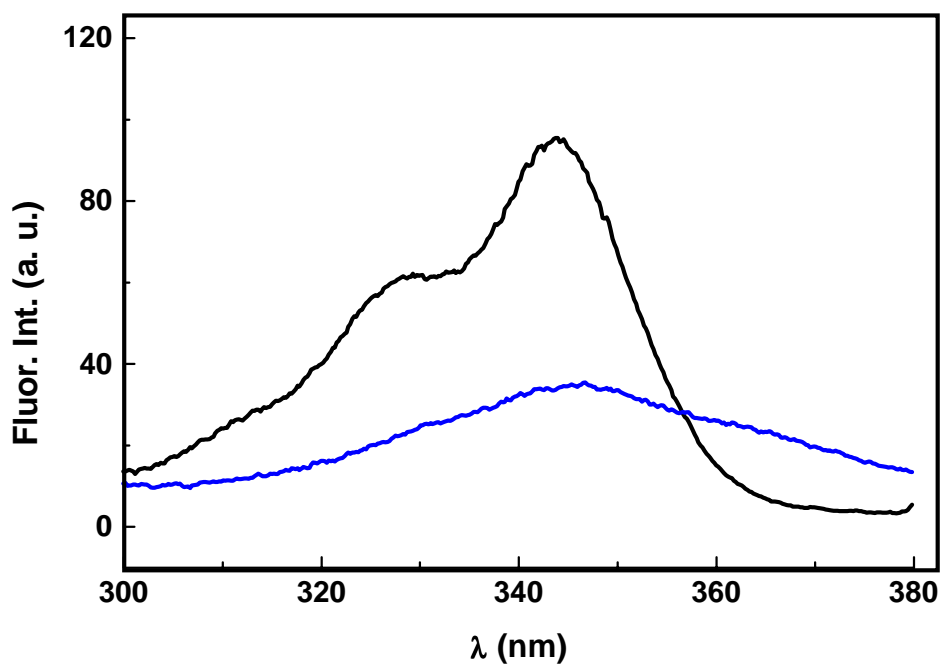

Figure 2. The excitation spectra for  $\lambda_{Em} = 397$  nm (in black) and  $\lambda_{Em} = 450$  nm (in blue).

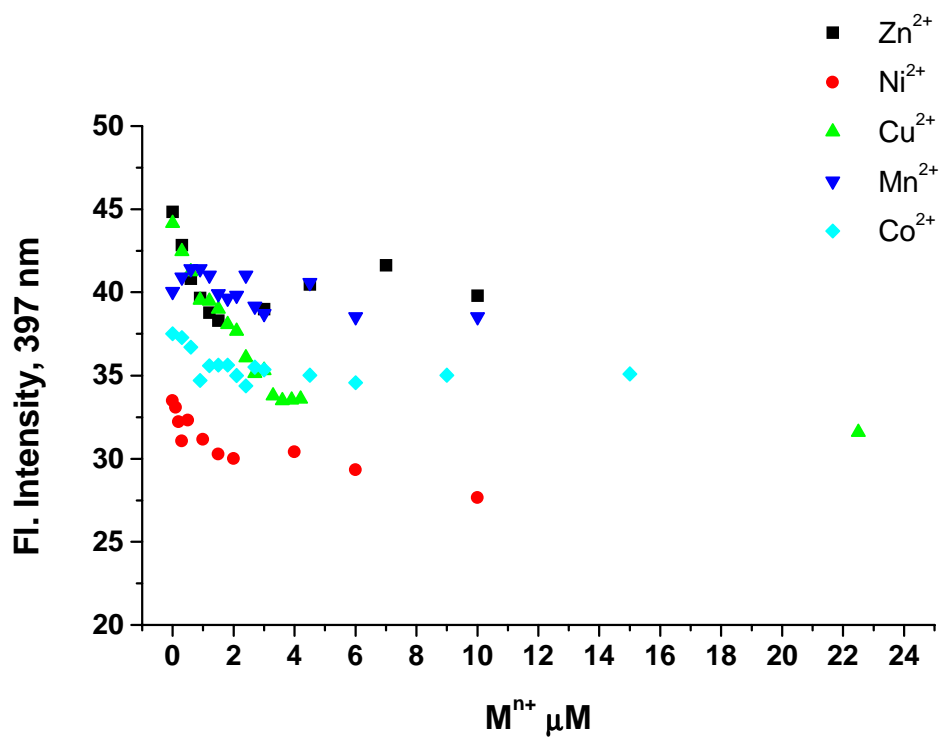

Figure 3. The effect of the addition of increasing amount of ZnCl<sub>2</sub>, NiCl<sub>2</sub>, CuCl<sub>2</sub>, MnCl<sub>2</sub> and CoCl<sub>2</sub> on Pybpa fluorescence in water. Here, the emission intensity at 397 nm is plotted against the metal ion concentration.
